# Supplementary material for: Identification of a protective B-cell epitope of the Staphylococcus aureus GapC protein by screening a phage-displayed random peptide library
Source: PubMed Central journal article supplement (PMC5755776; doi:10.1371/journal.pone.0190452), 2018-01-05
Supplement: pone.0190452.s002.pdf [file pone.0190452.s002.pdf]

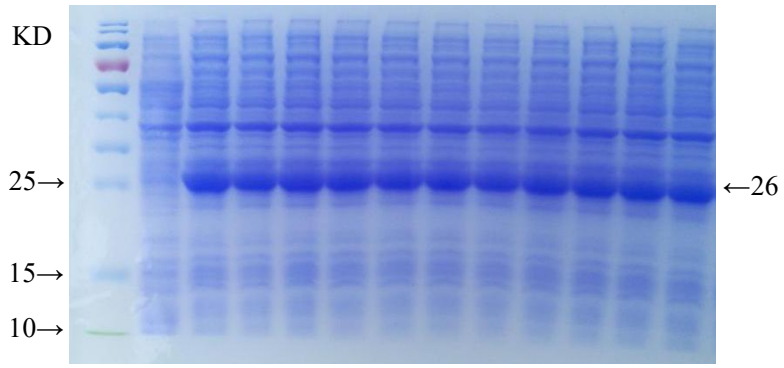

**S2 Fig. Expression of GST-epitope peptide.**
