# Supplementary material for: Identification of a protective B-cell epitope of the Staphylococcus aureus GapC protein by screening a phage-displayed random peptide library
Source: PubMed Central journal article supplement (PMC5755776; doi:10.1371/journal.pone.0190452), 2018-01-05
Supplement: pone.0190452.s003.pdf [file pone.0190452.s003.pdf]

| Cycles | mAb 1F4 (mg/L) | Washing (%TBST) | Input (pfu)          | Output(pfu)       | Yield                |
|--------|----------------|-----------------|----------------------|-------------------|----------------------|
| 1      | 100            | 0.1             | $1.0 \times 10^{11}$ | $2.5 \times 10^4$ | $2.5 \times 10^{-7}$ |
| 2      | 50             | 0.3             | $1.0 \times 10^{11}$ | $6.8 \times 10^8$ | $6.8 \times 10^{-3}$ |
| 3      | 30             | 0.5             | $1.0 \times 10^{11}$ | $7.3 \times 10^9$ | $7.3 \times 10^{-2}$ |

**S1 Table. Enrichment of positive phage clones by biopanning the PhD-12 library.**
