# Supplementary material for: Identification of a protective B-cell epitope of the Staphylococcus aureus GapC protein by screening a phage-displayed random peptide library
Source: PubMed Central journal article supplement (PMC5755776; doi:10.1371/journal.pone.0190452), 2018-01-05
Supplement: pone.0190452.s004.pdf [file pone.0190452.s004.pdf]

| Phage     | Amino acid sequence of the insert |                 |   |                 |                 |                 |                 |                 |                 |   |
|-----------|-----------------------------------|-----------------|---|-----------------|-----------------|-----------------|-----------------|-----------------|-----------------|---|
| 1         |                                   |                 |   | C               | P               | <b><u>D</u></b> | <b><u>E</u></b> | K               | H               | Q |
| 2         |                                   |                 |   | C               | P               | <b><u>D</u></b> | <b><u>E</u></b> | K               | H               | Q |
| 3         |                                   | <b><u>G</u></b> | L | P               | P               | R               | <b><u>E</u></b> | <b><u>I</u></b> | <b><u>V</u></b> | D |
| 4         |                                   | K               | A | C               | P               | <b><u>D</u></b> | <b><u>E</u></b> | K               | H               | S |
| 5         |                                   |                 |   | <b><u>T</u></b> | R               | N               | T               | R               | T               |   |
| 6         | Q                                 | E               | S | Q               | <b><u>E</u></b> | P               | D               | <b><u>I</u></b> | H               | Y |
| 7         |                                   | <b><u>G</u></b> | L | P               | P               | R               | <b><u>E</u></b> | <b><u>I</u></b> | <b><u>V</u></b> | D |
| 8         | I                                 | <b><u>G</u></b> | L | E               | M               | V               | F               | Q               | L               | I |
| 9         | I                                 | N               | V | <b><u>T</u></b> | K               | L               | L               | <b><u>I</u></b> | Q               | I |
| 10        | Q                                 | E               | S | Q               | <b><u>E</u></b> | P               | D               | <b><u>I</u></b> | H               | Y |
| 11        |                                   |                 | T | <b><u>T</u></b> | R               | N               | T               | R               | T               | R |
| 12        | Q                                 | R               | N | K               | A               | A               | H               | S               | <b><u>V</u></b> | N |
| Consensus |                                   | <b><u>G</u></b> | Y | <b><u>T</u></b> | <b><u>E</u></b> | <b><u>D</u></b> | <b><u>E</u></b> | <b><u>I</u></b> | <b><u>V</u></b> |   |
| GapC      | F                                 | <b><u>G</u></b> | Y | <b><u>T</u></b> | <b><u>E</u></b> | <b><u>D</u></b> | <b><u>E</u></b> | <b><u>I</u></b> | <b><u>V</u></b> | S |

**S2 Table. Amino acid sequences of PhD-12 phage-displaying peptides from the strongly positive phage clones after bio-panning.** Consensus amino acid motifs are shown in bold and underlined.
