# Supplementary material for: Identification of a protective B-cell epitope of the Staphylococcus aureus GapC protein by screening a phage-displayed random peptide library
Source: PubMed Central journal article supplement (PMC5755776; doi:10.1371/journal.pone.0190452), 2018-01-05
Supplement: pone.0190452.s005.pdf [file pone.0190452.s005.pdf]

| Coding motifs                                                                       | Name       | The sequences of oligonucleotides                    |
|-------------------------------------------------------------------------------------|------------|------------------------------------------------------|
| <sup>271</sup> FGYTEDEIVS <sup>280</sup>                                            | WT271-281S | 5'-gatccTTCGGTTACTGAAGACGAAATCGTTTCTc-3'             |
|                                                                                     | WT271-281R | 5'-tcgagAGAAACGATTTTCGTCTTCAGTGTAACCGAAg-3'          |
| <sup>271</sup> <b>AG</b> YTEDEIVS <sup>280</sup>                                    | F271A-S    | 5'-gatcc <u>GCG</u> GTTACTGAAGACGAAATCGTTTCTc-3'     |
|                                                                                     | F271A-R    | 5'-tcgagAGAAACGATTTTCGTCTTCAGTGTAACCG <u>C</u> Gg-3' |
| <sup>271</sup> F <b>A</b> YTEDEIVS <sup>280</sup>                                   | G272A-S    | 5'-gatccTTC <u>CG</u> TACTGAAGACGAAATCGTTTCTc-3'     |
|                                                                                     | G272A-R    | 5'-tcgagAGAAACGATTTTCGTCTTCAGTGTA <u>CG</u> CGAAg-3' |
| <sup>271</sup> FG <b>A</b> TEDEIVS <sup>280</sup>                                   | Y273A-S    | 5'-gatccTTCGGT <u>GCG</u> ACTGAAGACGAAATCGTTTCTc-3'  |
|                                                                                     | Y273A-R    | 5'-tcgagAGAAACGATTTTCGTCTTCAGT <u>CG</u> CACCGAAg-3' |
| <sup>271</sup> FG <b>Y</b> A <b>E</b> DEIVS <sup>280</sup>                          | T274A-S    | 5'-gatccTTCGGTTA <u>C</u> CGGAAGACGAAATCGTTTCTc-3'   |
|                                                                                     | T274A-R    | 5'-tcgagAGAAACGATTTTCGTCTTC <u>CG</u> CGTAACCGAAg-3' |
| <sup>271</sup> FG <b>Y</b> T <b>A</b> DEIVS <sup>280</sup>                          | E275A-S    | 5'-gatccTTCGGTTACT <u>G</u> CGGACGAAATCGTTTCTc-3'    |
|                                                                                     | E275A-R    | 5'-tcgagAGAAACGATTTTCGT <u>CC</u> GCAGTGTAACCGAAg-3' |
| <sup>271</sup> FG <b>Y</b> T <b>E</b> <b>A</b> EIVS <sup>280</sup>                  | D276A-S    | 5'-gatccTTCGGTTACTGA <u>A</u> CGGAAATCGTTTCTc-3'     |
|                                                                                     | D276A-R    | 5'-tcgagAGAAACGATTT <u>CC</u> GCTTCAGTGTAACCGAAg-3'  |
| <sup>271</sup> FG <b>Y</b> T <b>E</b> D <b>A</b> IVS <sup>280</sup>                 | E277A-S    | 5'-gatccTTCGGTTACTGAAGAC <u>G</u> CGATCGTTTCTc-3'    |
|                                                                                     | E277A-R    | 5'-tcgagAGAAACGAT <u>CG</u> CGTCTTCAGTGTAACCGAAg-3'  |
| <sup>271</sup> FG <b>Y</b> T <b>E</b> D <b>E</b> <b>A</b> VS <sup>280</sup>         | I278A-S    | 5'-gatccTTCGGTTACTGAAGACGA <u>A</u> CGGTTTCTc-3'     |
|                                                                                     | I278A-R    | 5'-tcgagAGAAAC <u>CG</u> CTTCGTCTTCAGTGTAACCGAAg-3'  |
| <sup>271</sup> FG <b>Y</b> T <b>E</b> D <b>E</b> I <b>A</b> S <sup>280</sup>        | V279A-S    | 5'-gatccTTCGGTTACTGAAGACGAAAT <u>C</u> CGTCTc-3'     |
|                                                                                     | V279A-R    | 5'-tcgagAGAC <u>CG</u> GATTTTCGTCTTCAGTGTAACCGAAg-3' |
| <sup>271</sup> FG <b>Y</b> T <b>E</b> D <b>E</b> I <b>V</b> <b>A</b> <sup>280</sup> | S280A-S    | 5'-gatccTTCGGTTACTGAAGACGAAATCGTT <u>G</u> CGc-3'    |
|                                                                                     | S280A-R    | 5'-tcgag <u>CG</u> CAACGATTTTCGTCTTCAGTGTAACCGAAg-3' |

**S3 Table. The oligonucleotides encoding the truncated GapC amino-terminus and the alanine-scanning peptides.** The mutational sites are shown in lowercase letters. The mutated amino acids are bold and underlined.
